# Supplementary material
Source: PubMed Central journal article supplement (PMC4198027)
Supplement: embj0033-1243-sd1.pdf [file embj0033-1243-sd1.pdf]

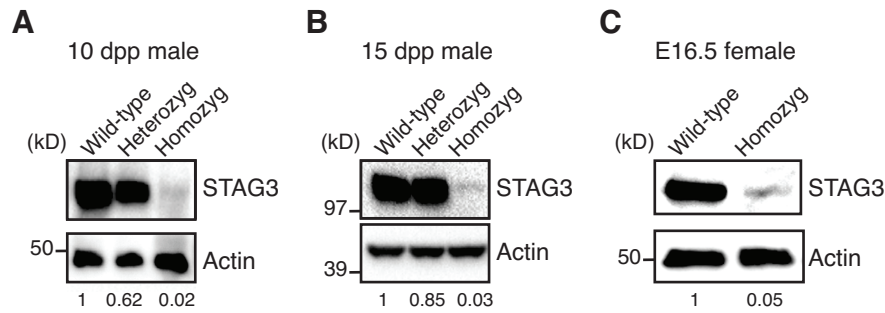

**Figure S1. Analysis of STAG3 expression in homozygous *Stag3* mutant spermatocytes and oocytes.**

**(A and B)** Immunoblotting analysis of testicular protein extracts from 10-day post-partum (dpp) males (A), in which the most mature wild-type germ cells have reached the early zygotene stage of meiosis I, and from 15-dpp males (B), in which the most mature wild-type germ cells have reached the pachytene stage of meiosis I. Wild-type, heterozygous *Stag3* mutant and homozygous *Stag3* mutant mice were analyzed. The signals were quantified and relative values for STAG3 normalized to Actin are presented below the panels.

**(C)** Immunoblotting analysis of ovarian protein extracts from wild-type and homozygous *Stag3* mutant embryos (E16.5). The signals were quantified and relative values for STAG3 normalized to Actin are presented below the panels.
