# Supplementary material
Source: PubMed Central journal article supplement (PMC4198027)
Supplement: embj0033-1243-sd2.pdf [file embj0033-1243-sd2.pdf]

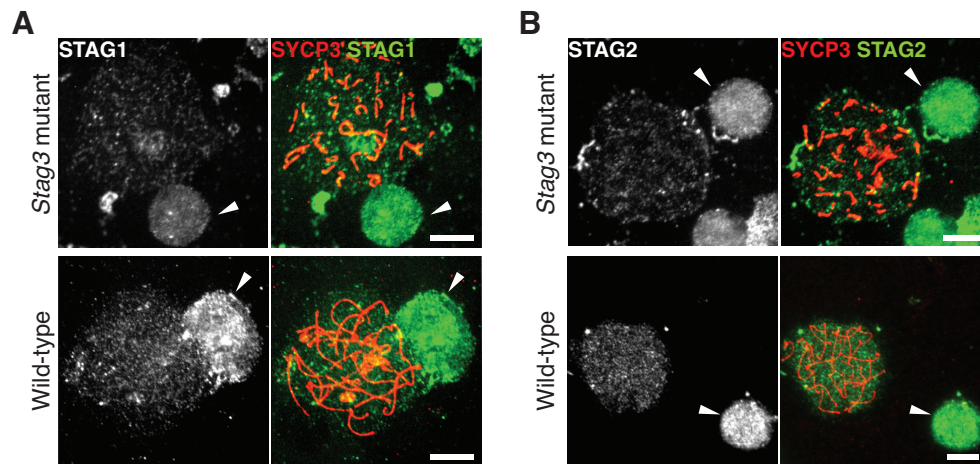

**Figure S2. STAG1 and STAG2 do not accumulate at the meiotic chromosome axes in homozygous *Stag3* mutant oocytes.**

**(A)** Immunostaining of wild-type and homozygous *Stag3* mutant E16.5 oocytes for STAG1 and SYCP3. Arrowheads indicate somatic cells that show abundant STAG1 chromatin staining. Bars, 10  $\mu$ m.

**(B)** Immunostaining of wild-type and homozygous *Stag3* mutant E16.5 oocytes for STAG2 and SYCP3. Arrowheads indicate somatic cells that show abundant STAG2 chromatin staining. Bars, 10  $\mu$ m.
