# Supplementary material
Source: PubMed Central journal article supplement (PMC4198027)
Supplement: embj0033-1243-sd3.pdf [file embj0033-1243-sd3.pdf]

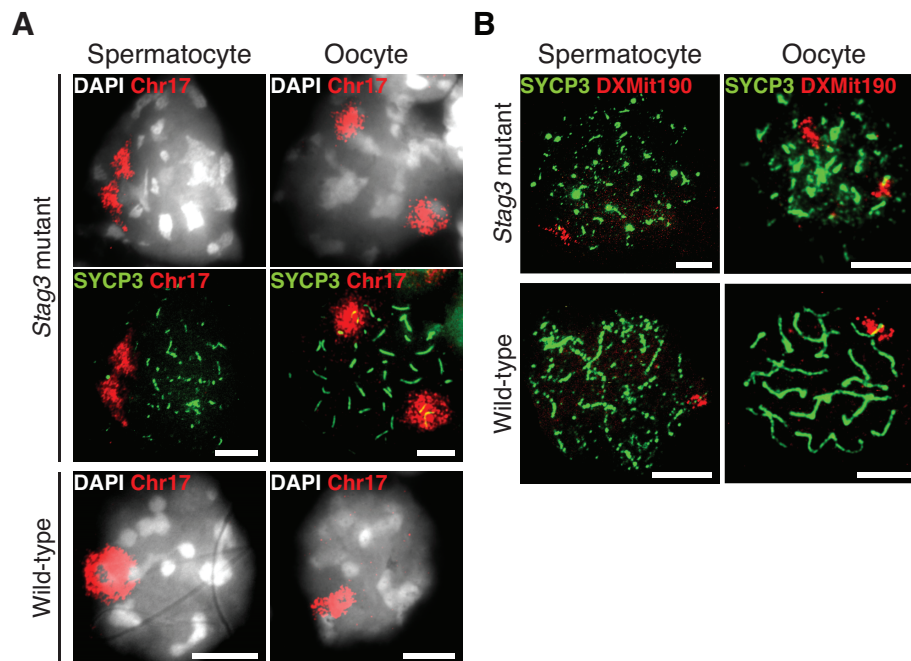

**Figure S3. Homologous chromosome synapsis is abrogated in homozygous *Stag3* mutant meocytes, whereas sister chromatid cohesion is retained.**

**(A)** Hybridization of a chromosome 17 DNA probe to spermatocytes and oocytes. Bars, 10  $\mu\text{m}$ .

**(B)** Hybridization of a regional (DXMit190) X chromosome DNA probe to spermatocytes and oocytes. Bars, 10  $\mu\text{m}$ .
