# Supplementary material
Source: PubMed Central journal article supplement (PMC4198027)
Supplement: embj0033-1243-sd4.pdf [file embj0033-1243-sd4.pdf]

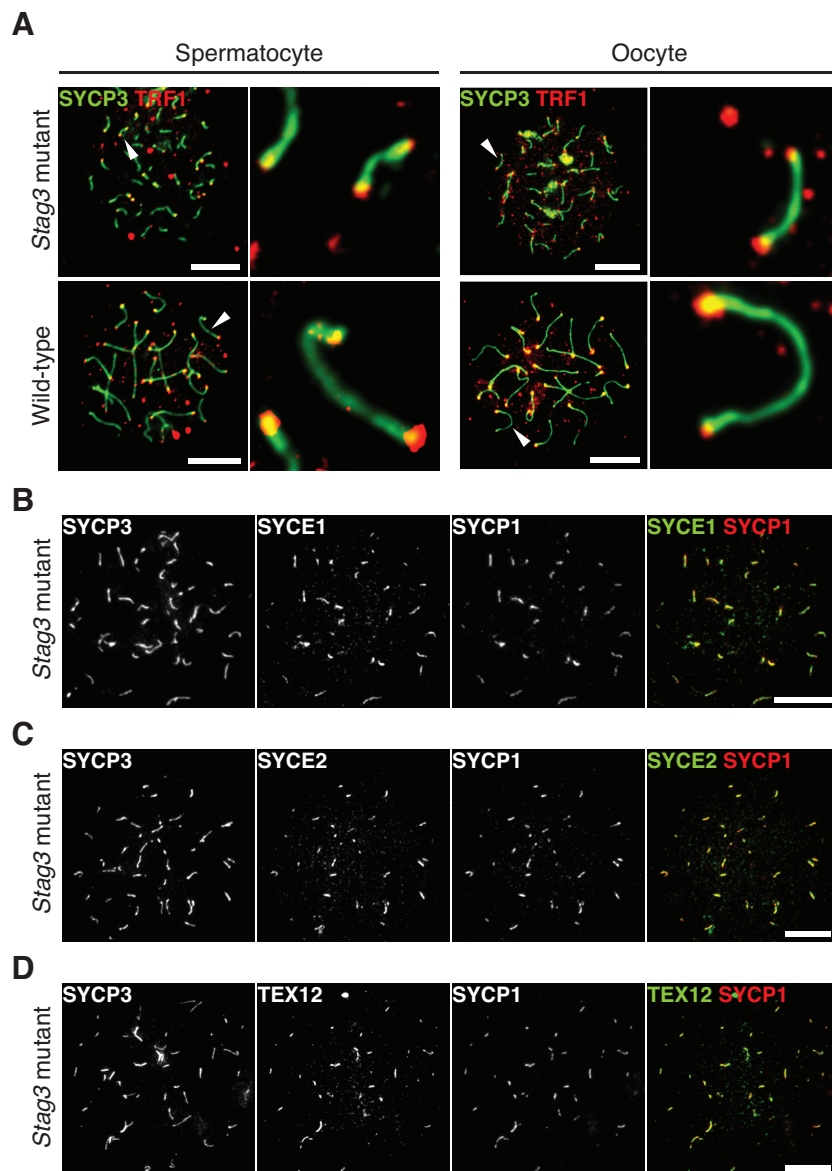

**Figure S4. Chromosome axis morphology in *Stag3* mutant meocytes.**

**(A)** Immunostaining of wild-type and homozygous *Stag3* mutant spermatocytes (left) and E18.5 oocytes (right) for TRF1 (a telomere protein) and SYCP3. Enlarged views of the axes (arrowheads) are shown to the right. Bars, 10  $\mu$ m.

**(B-D)** Immunostaining of wild-type and homozygous *Stag3* mutant spermatocytes for SYCP3 and SYCP1, as well as either SYCE1 (B), SYCE2 (C) or TEX12 (D). Bars, 10  $\mu$ m.
