# Supplementary material
Source: PubMed Central journal article supplement (PMC4198027)
Supplement: embj0033-1243-sd5.pdf [file embj0033-1243-sd5.pdf]

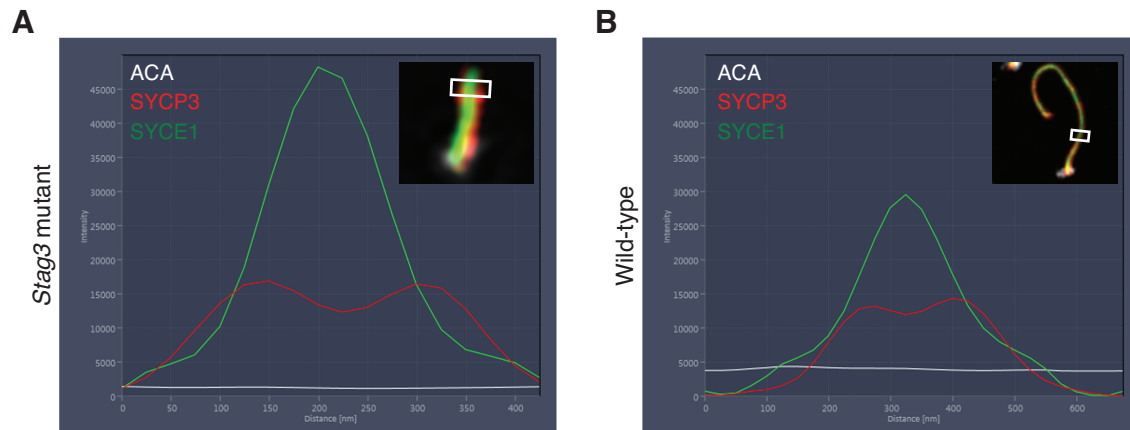

**Figure S5. A tripartite SC-like structure is found along the axis of univalents in homozygous *Stag3* mutant spermatocytes.**

**(A and B)** Quantification of signal distribution within the highlighted region for ACA (white), SYCP3 (red) and SYCE1 (green) on representative homozygous *Stag3* mutant (A) and wild-type (B) meiotic chromosomes.
