# Supplementary material
Source: PubMed Central journal article supplement (PMC4198027)

**Figure 5C****Figure 5D**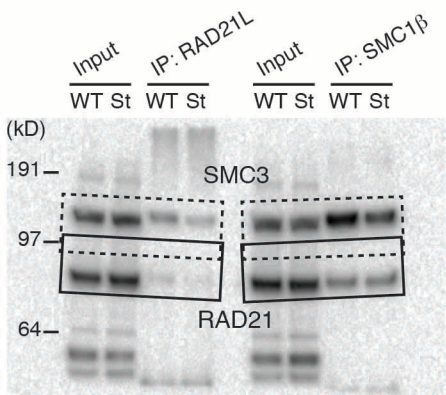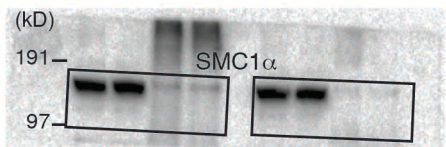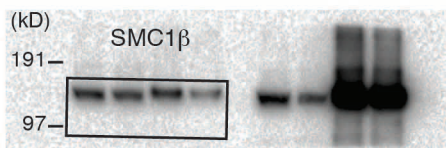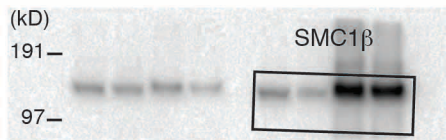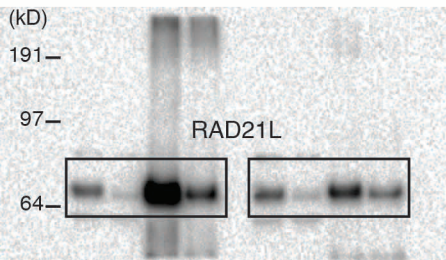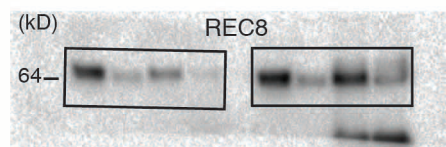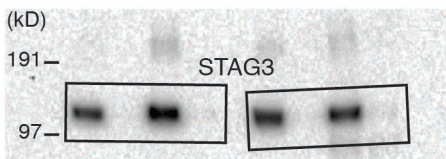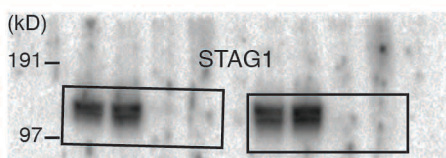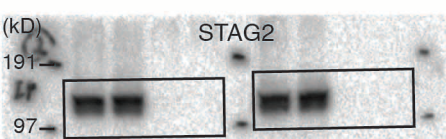

Supplement: embj0033-1243-sd10.pdf [file embj0033-1243-sd10.pdf]

**Figure S1A**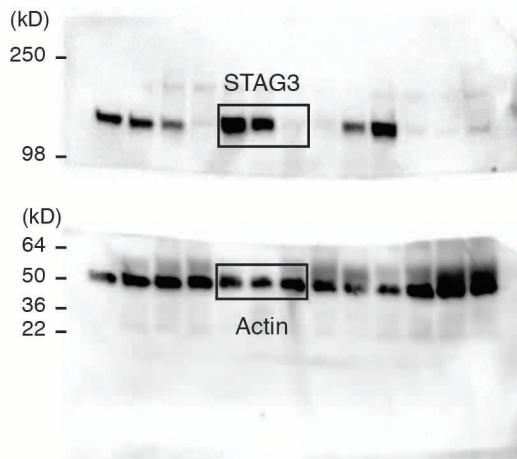**Figure S1B**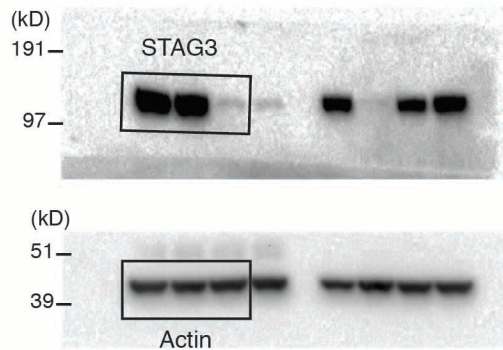**Figure S1C**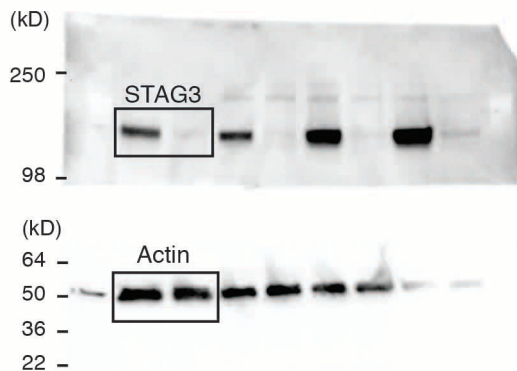

Supplement: embj0033-1243-sd6.pdf [file embj0033-1243-sd6.pdf]

Figure 2B

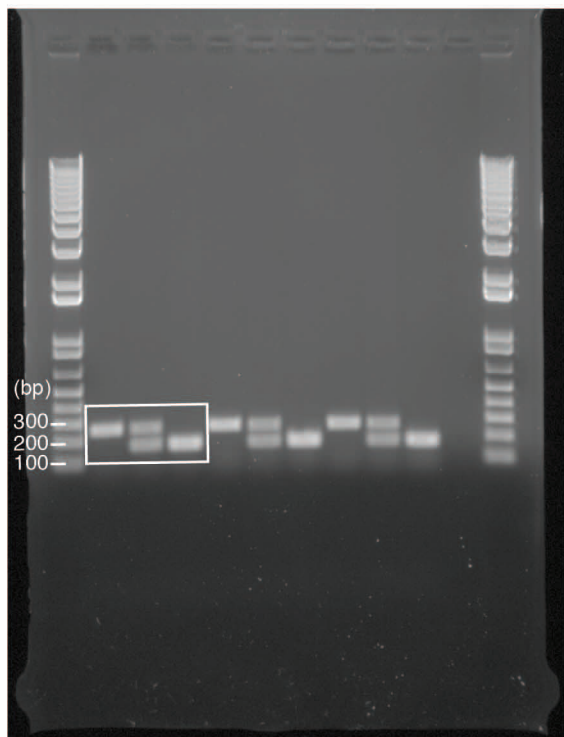

Figure 2C

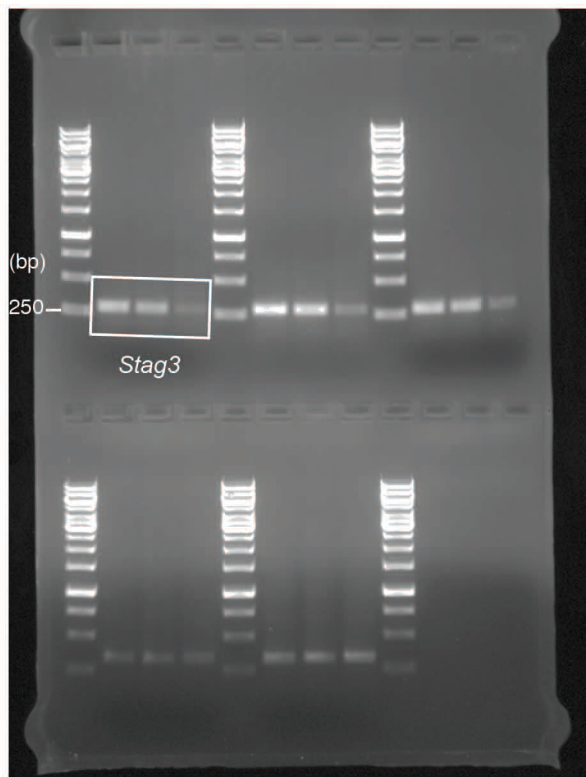

Figure 2D

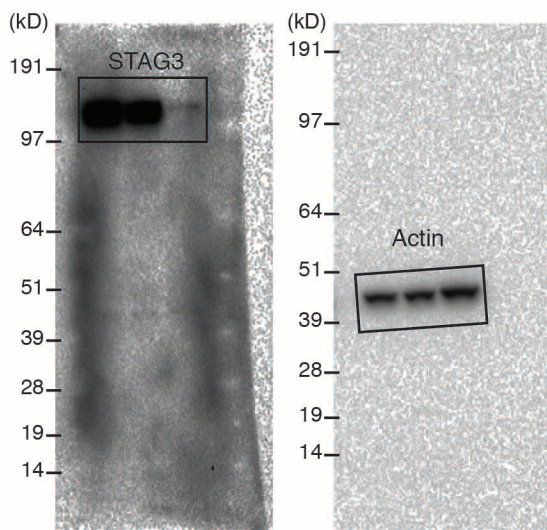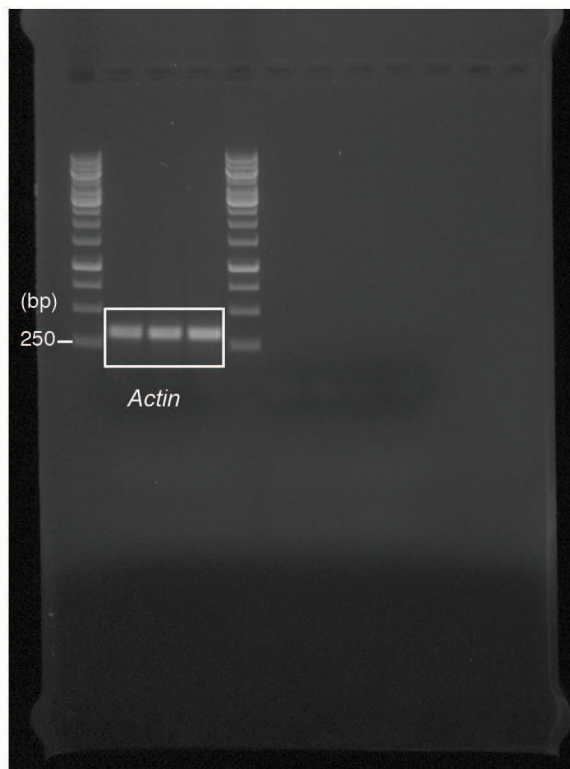

Supplement: embj0033-1243-sd8.pdf [file embj0033-1243-sd8.pdf]

**Figure 3D**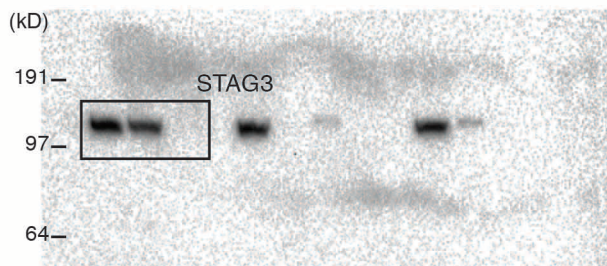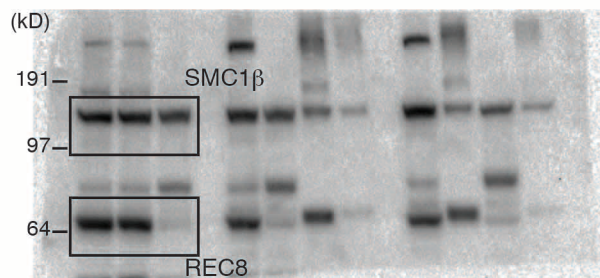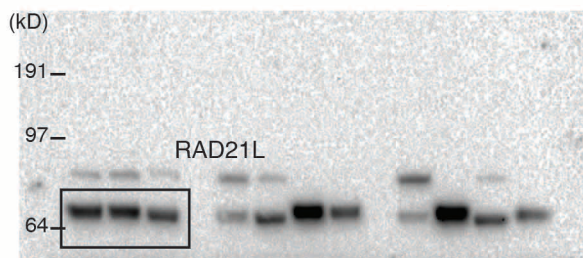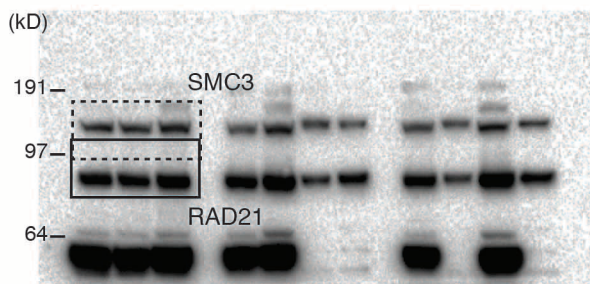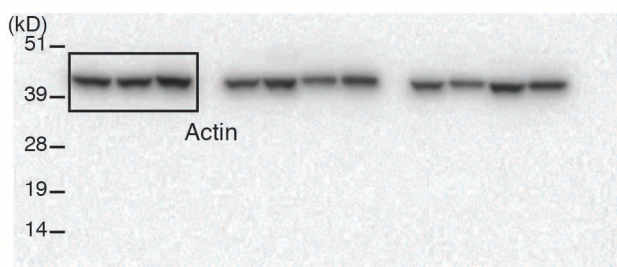**Figure 3E**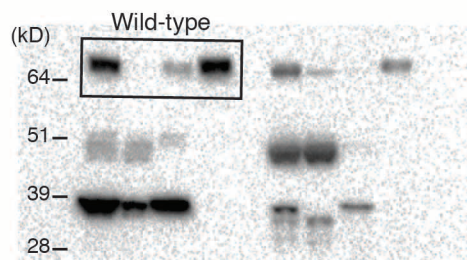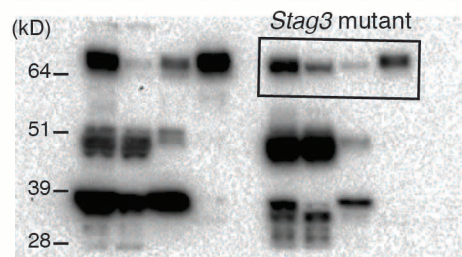

Supplement: embj0033-1243-sd9.pdf [file embj0033-1243-sd9.pdf]
